# Supplementary material for: Observations of OH airglow from ground, aircraft, and satellite: investigation of wave-like structures before a minor stratospheric warming
Source: Copernicus journal article supplement (doi:10.5194/acp-19-6401-2019), 2019-05-16
Supplement: Supplementary file 1 [file acp-19-6401-2019-supplement.zip]

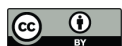

## *Supplement of*

# **Observations of OH airglow from ground, aircraft, and satellite: investigation of wave-like structures before a minor stratospheric warming**

**Sabine Wüst et al.**

*Correspondence to:* Sabine Wüst ([sabine.wuest@dlr.de](mailto:sabine.wuest@dlr.de))

- [acp-19-6401-2019-supplement-title-page.pdf](#)
- [FalconOHAirglow\\_50\\_201601\\_1415.wmv](#)
- [FalconOHAirglow\\_50\\_201601\\_2829.wmv](#)
- [Video Description.docx](#)

The copyright of individual parts of the supplement might differ from the CC BY 4.0 License.
