# Supplementary material for: Observations of OH airglow from ground, aircraft, and satellite: investigation of wave-like structures before a minor stratospheric warming
Source: Copernicus journal article supplement (doi:10.5194/acp-19-6401-2019), 2019-05-16
Supplement: Supplementary file 1 [file Video Description.docx]

Video Description:

The left part shows the original image, the mid part shows the flight route colour-coded is the intensity averaged over the respective picture, and the right part shows the difference images.

Information about the orientation and height of the plane are given in the lower right part of the original and the difference image.
